# Supplementary material for: Benefits of electronic charts in intensive care and during a world health pandemic: advantages of the technology age
Source: PubMed Central journal article supplement — BMJ Open Qual. 2023 Jan 17;12(1):e001704. doi: 10.1136/bmjoq-2021-001704 (PMC9853220; doi:10.1136/bmjoq-2021-001704), 2023-01-17
Supplement: bmjoq-2021-001704supp001.pdf [file bmjoq-2021-001704supp001.pdf]

## Appendices

### Appendix 1: User Questionnaire

*Users were given paper questionnaire and were offered yes/no/don't know answers*

#### Pre-questionnaire.

1. I am looking forward to the introduction of electronic patient records in ICU
2. I think that the introduction of electronic patient records in ICU is a good idea in healthcare
3. I think this would personally help me in my job role
4. I think that the transition from paper to computer in ICU will improve patient safety?
5. I think that the transition from paper to computer in ICU will improve patient care?
6. I think that the transition from paper to computer in ICU will over time be quicker for nurses to fill in data?
7. I think that the transition from paper to computer in ICU will reduce calculation errors?

#### Post-questionnaire

1. I think that the introduction of electronic patient records in ICU is a good idea in healthcare
2. I think that the introduction of electronic patient records in ICU has helped me in my job role
3. I think that the transition from paper to computer in ICU has improved patient safety?
4. I think that the transition from paper to computer in ICU has improved patient care?
5. I think that the transition from paper to computer in ICU has is quicker for nurses to fill in data?
6. I think that the transition from paper to computer in ICU reduces calculation errors?
